# Supplementary material for: Hydrothermal synthesis and characterization of a series of luminescent Ag(i) coordination polymers with two new multidentate bis-(1,2,3-triazole) ligands: structural diversity, polymorphism and photoluminescent sensing
Source: Royal Society of Chemistry journal article supplement (doi:10.1039/c6ce01275b), 2016-01-01
Supplement: c6ce01275b1.pdf [file c6ce01275b1.pdf]

## Supporting information

### Hydrothermal Synthesis and Characterization of A Series of Luminescent Ag(I) Coordination Polymers with Two New Multi-dentate Bis-(1,2,3-triazole) Ligands: Structural diversity, Polymorphism and Photo-luminescent sensing

Jian Zhong Huo<sup>a,b</sup>, Xiu Mei Su<sup>a,b</sup>, Xiang Xia Wu<sup>a,b</sup>, Yuan Yuan Liu<sup>a,b</sup>, and Bin Ding<sup>\*a,b</sup>

<sup>a</sup> Tianjin Key Laboratory of Structure and Performance for Functional Molecule, Tianjin Normal University, Tianjin 300071, P. R. China

<sup>b</sup> Key Laboratory of Inorganic-Organic hybrid Functional Material Chemistry (Tianjin Normal University), Ministry of Education, Tianjin 300071, P. R. China.

**Table S1** Selected hydrogen bonds lengths [Å] and angles [°] for **1-5**.

| Donor-H...Acceptor  | D-H  | H...A | D...A    | D-H...A |
|---------------------|------|-------|----------|---------|
| <b>1</b>            |      |       |          |         |
| C(4)-H(4B)...F(6)   | 0.97 | 2.48  | 3.358(4) | 151     |
| C(9)-H(9)...F(2)    | 0.93 | 2.44  | 3.335(4) | 160     |
| C(11)-H(11B)...F(1) | 0.97 | 2.49  | 3.396(5) | 156     |
| C(14)-H(14B)...F(3) | 0.97 | 2.45  | 3.391(5) | 162     |
| <b>2</b>            |      |       |          |         |
| C(1)-H(1)...F(2)    | 0.93 | 2.23  | 3.0797   | 152     |
| C(3)-H(3B)...F(3)   | 0.97 | 2.43  | 3.3147   | 152     |
| C(10)-H(10)...F(4)  | 0.93 | 2.45  | 3.3116   | 153     |
| <b>3</b>            |      |       |          |         |
| C(1)-H(1)...F(3)    | 0.93 | 2.29  | 3.2107   | 171     |
| C(2)-H(2)...F(4)    | 0.93 | 2.42  | 3.2892   | 155     |
| C(3)-H(3B)...N(8)   | 0.97 | 2.50  | 3.4442   | 163     |
| C(11)-H(11B)...F(4) | 0.97 | 2.45  | 3.3617   | 157     |
| <b>4</b>            |      |       |          |         |
| C(1)-H(1)...F(5)    | 0.93 | 2.41  | 3.3293   | 170     |
| C(5)-H(5)...F(3)    | 0.93 | 2.37  | 3.2137   | 151     |
| C(10)-H(10A)...F(2) | 0.97 | 2.34  | 3.3082   | 174     |
| C(10)-H(10B)...F(6) | 0.97 | 2.45  | 3.3260   | 150     |
| <b>5</b>            |      |       |          |         |
| C(3)-H(3A)...O(2)   | 0.97 | 2.52  | 3.4132   | 152     |

\*Corresponding author email: hxydb@mail.tjnu.edu.cn.

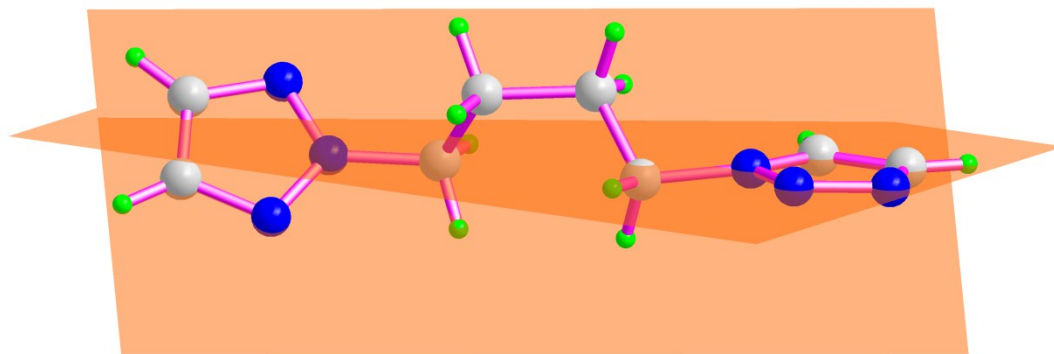

**Scheme S1** The flexible dihedral angles between two aromatic triazole moieties in  $L_1$  indicating different spatial steric effect.

**Table S2** The flexible dihedral angles between two aromatic triazole moieties in  $L_1$  for **1-4**.

|          | Dihedral angles between two aromatic triazole moieties ( $^\circ$ ) |
|----------|---------------------------------------------------------------------|
| <b>1</b> | 19.6(9) and 41.5(4)                                                 |
| <b>2</b> | 62.0(4)                                                             |
| <b>3</b> | 43.30(5)                                                            |
| <b>4</b> | 74.8(2)                                                             |

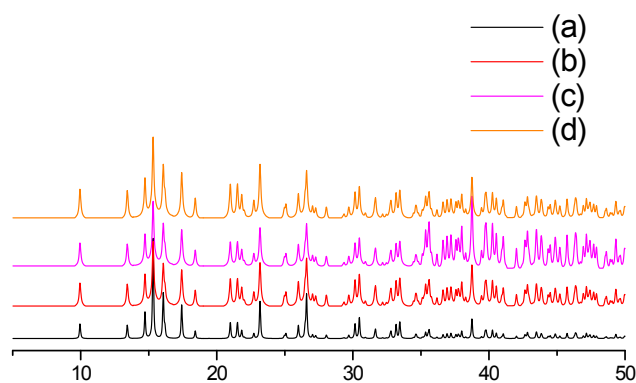

**Fig. S1** PXRD patterns for (a) calculated on the basis of the structure determined by single-crystal X-ray diffraction of **5**. (b) X-ray diffractograms of as-synthesized **5**; (c) the samples of **5** immersed into the aqueous solutions for 24 h; (d) the samples of **5** immersed into dichromate ( $10^{-4}$  M) aqueous solutions for 24 h.
